# Supplementary material
Source: publisher figshare collection journal article supplement (https://karger.figshare.com/ndownloader/files/24093158)
Supplement: Supplementary file 1 [file 24093158]

| **Comparison** | **t-value (df)** | **p-value** |
| --- | --- | --- |
| 3 MONTHS | | |
| CNC EAS eligible vs. ineligible | 0.214 (81) | 0.831 |
| AzbioQ EAS eligible vs. ineligible | 0.0979 (62) | 0.922 |
| AzbioN EAS eligible vs. ineligible | 0.294 (56) | 0.770 |
| CNC EAS user vs. non-user | 2.41(43) | 0.02 |
| AzbioQ EAS user vs. non-user | 1.488 (32) | 0.146 |
| AzbioN EAS user vs. non-user | 0.266 (30) | 0.792 |
| 12 MONTHS | | |
| CNC EAS eligible vs. ineligible | 1.227 (44) | 0.226 |
| AzbioQ EAS eligible vs. ineligible | 1.17(34) | 0.251 |
| AzbioN EAS eligible vs. ineligible | 1.093 (27) | 0.284 |
| CNC EAS user vs. non-user | 4.396(22) | 0.00023* |
| AzbioQ EAS user vs. non-user | 2.486(15) | 0.025 |
| AzbioN EAS user vs. non-user | 1.42(12) | 0.181 |

Appendix 1: Independent t-tests between groups for speech perception scores.
